# Supplementary material for: Novel multi-sensitive pseudo-poly(amino acid) for effective intracellular drug delivery
Source: Royal Society of Chemistry journal article supplement (doi:10.1039/c5ra03423j), 2015-01-01
Supplement: c5ra03423j1.pdf [file c5ra03423j1.pdf]

Supporting Information for

## **Novel Multi-responsive Pseudo-poly(amino acid) For Effective Intracellular Drug Delivery**

Yanjuan Wu,<sup>a,b</sup> Dongfang Zhou,<sup>a</sup> Yanxin Qi,<sup>a</sup> Zhigang Xie,<sup>a</sup> Xuesi Chen,<sup>a</sup> Xiabin Jing<sup>a</sup>  
and Yubin Huang<sup>\*a</sup>

<sup>a</sup>State Key Laboratory of Polymer Physics and Chemistry, Changchun Institute of Applied Chemistry, Chinese Academy of Sciences, Changchun 130022, P. R. China

E-mail: ybhuang@ciac.jl.cn; Fax: +86 431 85262769; Tel: +86 431 85262769

<sup>b</sup>Graduate University of the Chinese Academy of Sciences, Beijing 100039, P. R. China

### **Contents of the Supplementary Information document:**

**Figure S1.** <sup>1</sup>H NMR spectra of monomers.

**Figure S2.** FT-IR spectra of monomers.

**Figure S3.** <sup>1</sup>H NMR spectra of hydrophobic blocks and PRDSP.

**Figure S4.** GPC spectra of PRDSP under different conditions.

**Figure S5.** Critical aggregation concentration (CAC) of PRDSP.

**Figure S6.** Average diameters of PRDSP@DOX NPs monitored by DLS and TEM.

**Figure S7.** The size distribution of PRDSP NPs under different conditions.

**Figure S8.** The flow cytometry analyses of intracellular ROS concentrations.

**Figure S9.** The flow cytometry analyses of cellular uptake of free DOX and PRDSP@DOX towards HeLa cells.

**Figure S10.** In vitro cytotoxicities of DOX and PRDSP@DOX to HeLa/A549 cells.

**Figure S11.** Representative CLSM images of A549 cells incubated with DOX and PRDSP@DOX.

**Figure S12.** Zeta potential (mv) of blank PRDSP NPs and PRDSP@DOX NPs.

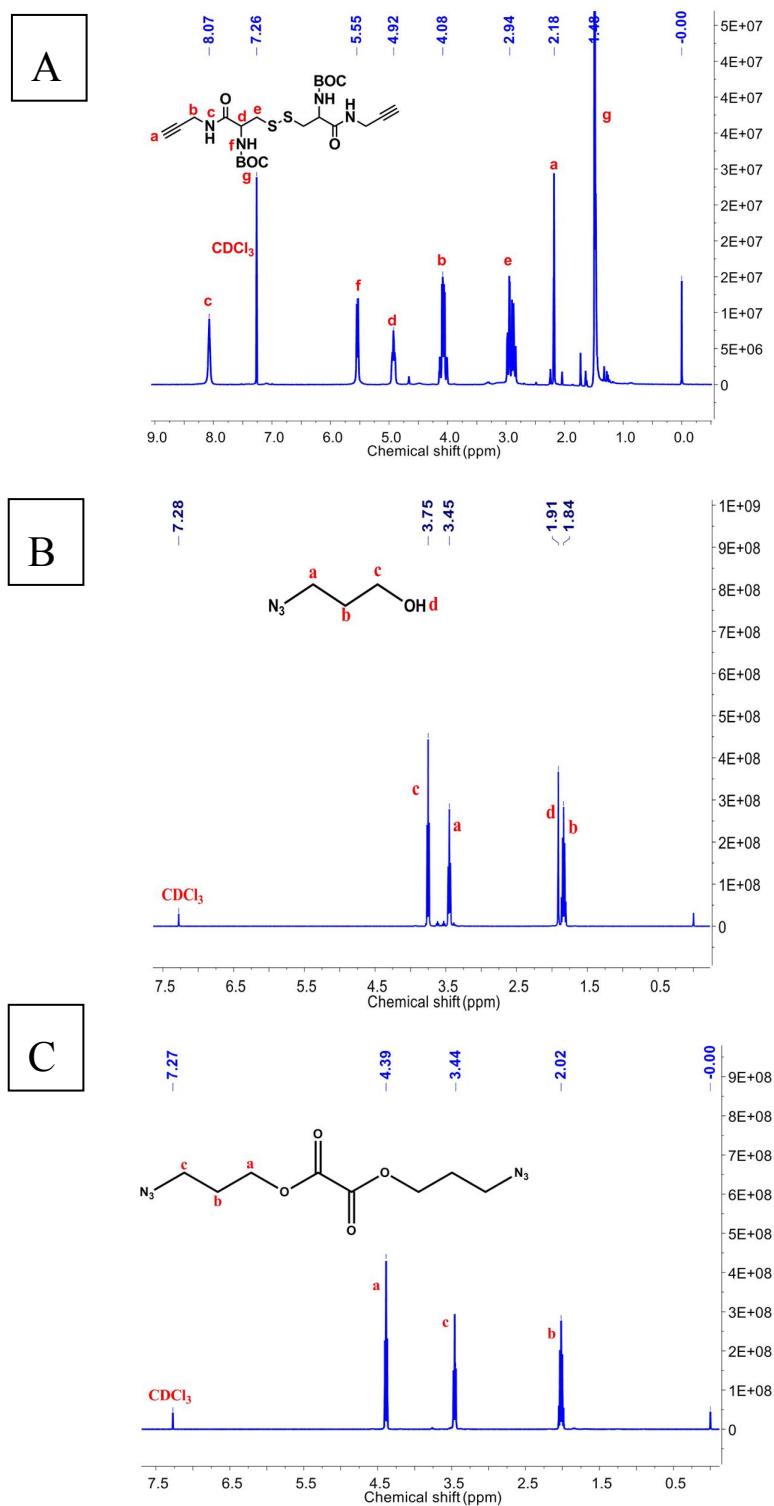

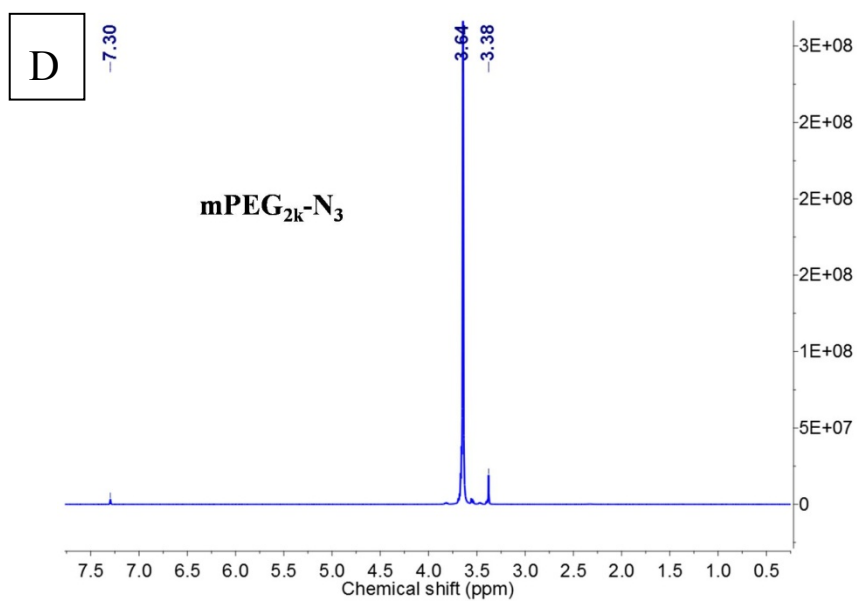

**Figure S1.** <sup>1</sup>H NMR of monomers in CDCl<sub>3</sub>.

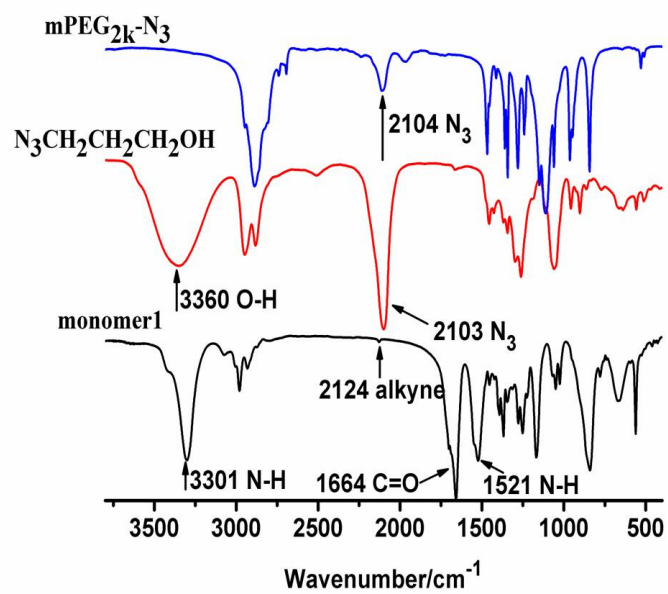

**Figure S2.** FT-IR spectra of monomers.

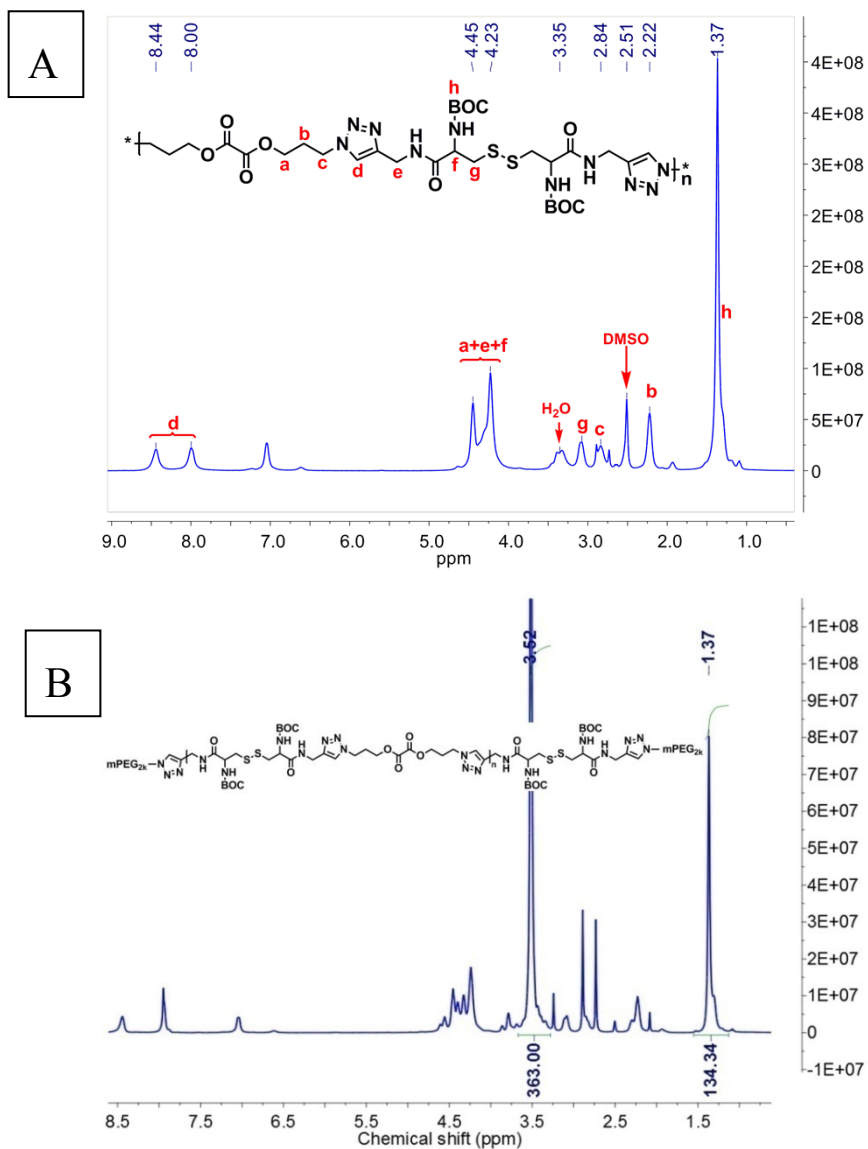

**Figure S3.**  $^1\text{H}$  NMR of hydrophobic block and PRDSP in  $\text{DMSO-D}_6$ .

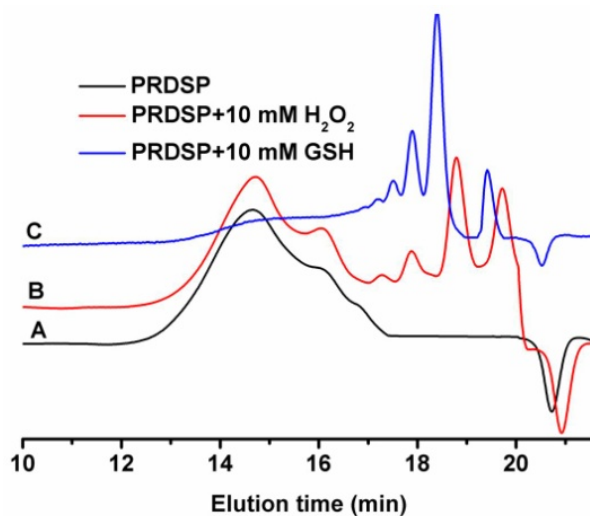

**Figure S4.** GPC spectra of PRDSP under different conditions. GPC traces of (A) PRDSP triblock copolymer; (B) the PRDSP copolymer in THF (10 mg/mL) after 12 h

reaction with  $\text{H}_2\text{O}_2$ , the ratio of  $\text{H}_2\text{O}_2$  and peroxalate ester bonds being 8:1; (C) the PRDSP copolymer in THF(10 mg/mL) after 12 h reaction with GSH, the molar ratio of GSH and disulfide groups being 8:1.

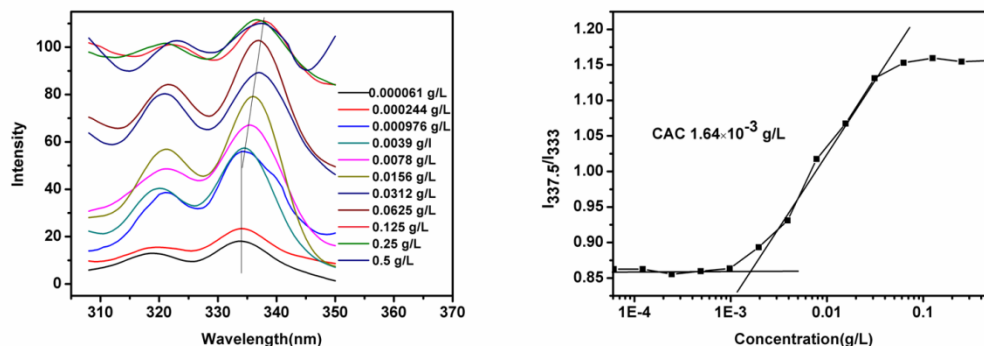

**Figure S5.** Critical aggregation concentration (CAC) of PRDSP.

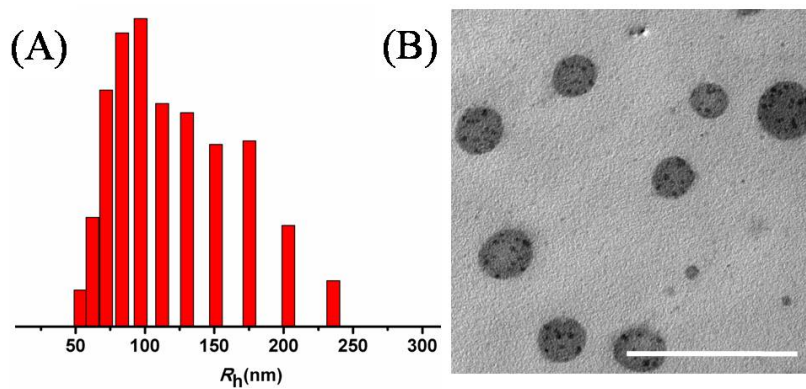

**Figure S6.** (A) average diameters of PRDSP@DOX NPs monitored by DLS, and (B) TEM micrograph of PRDSP@DOX NPs (scale bars: 500 nm).

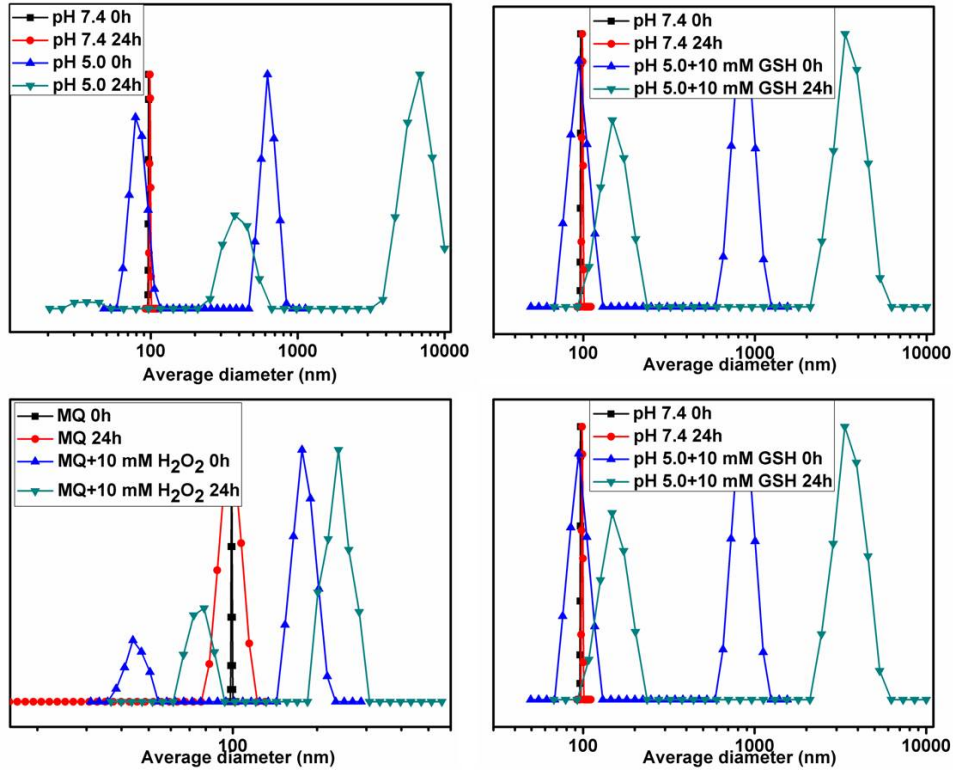

**Figure S7.** The size distribution of PRDSP NPs under different conditions.

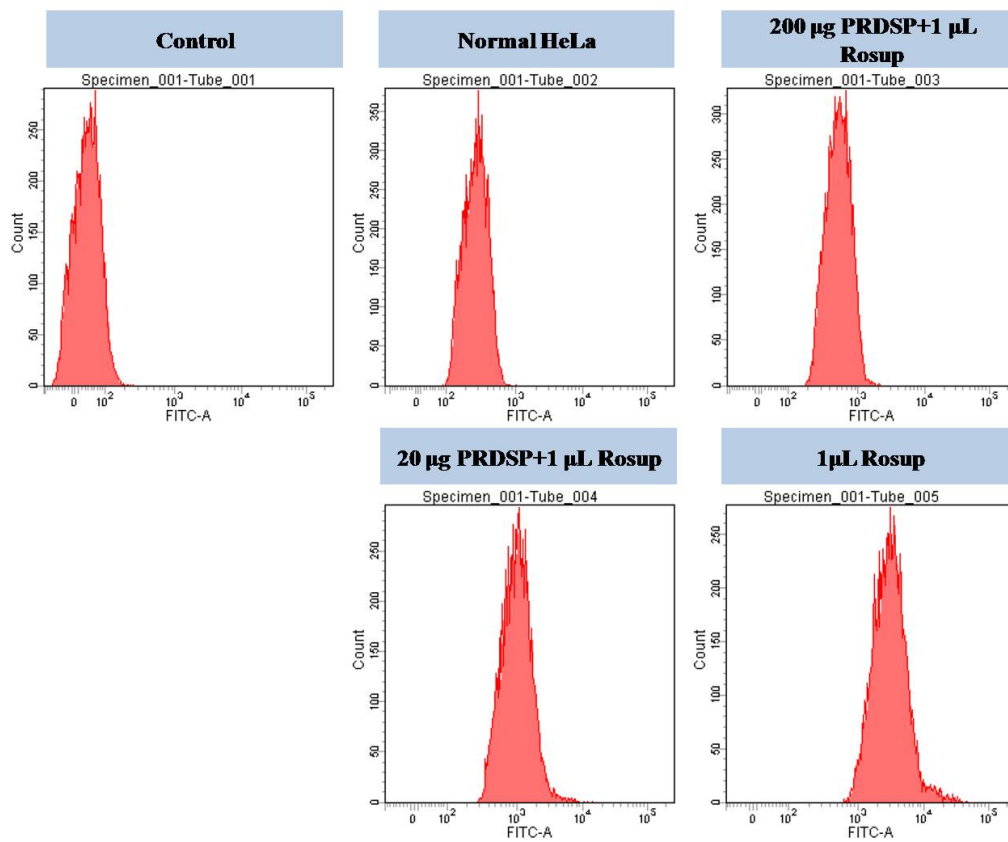

**Figure S8.** The flow cytometry analyses of intracellular ROS concentrations.

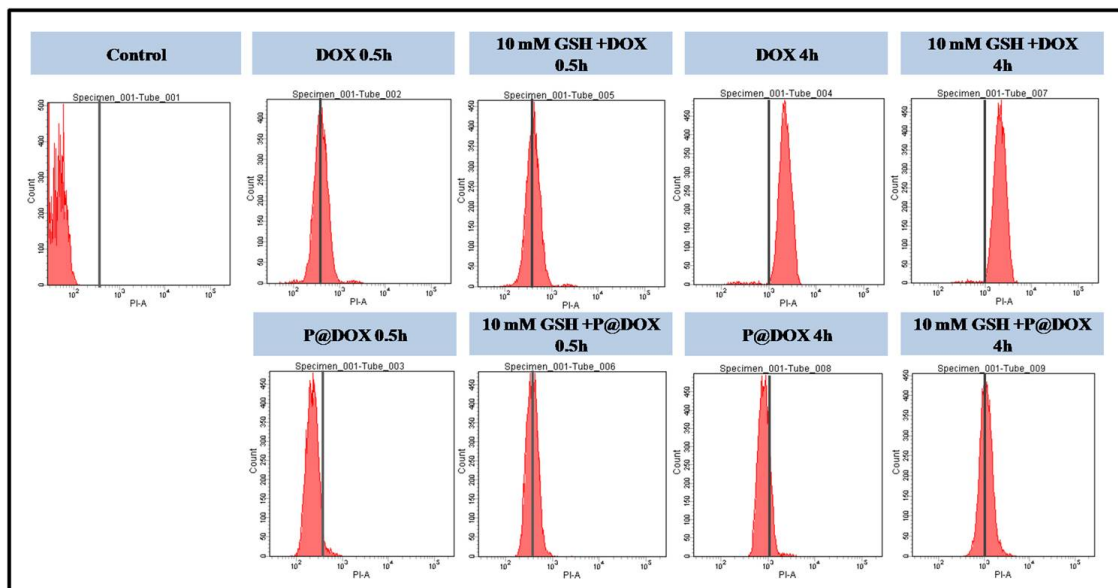

**Figure S9.** The flow cytometry analyses of cellular uptake of free DOX and PRDSP@DOX towards HeLa cells.

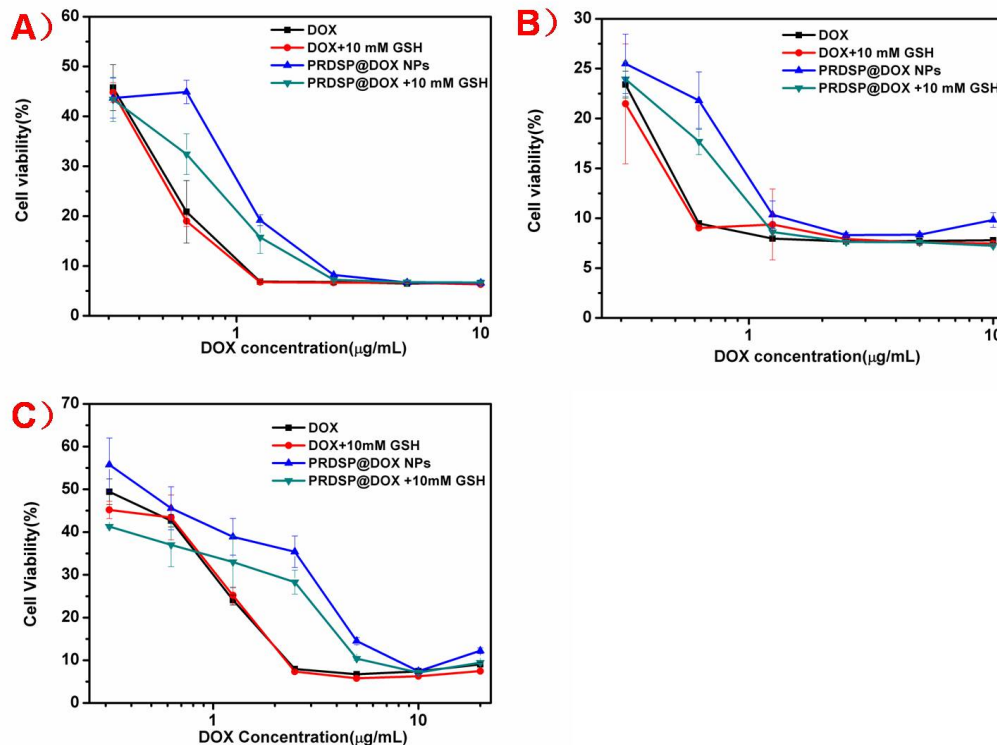

**Figure S10.** In vitro cytotoxicity of PRDSP@DOX NPs and free DOX ·HCl at various DOX concentrations towards 10 mM GSH-pretreated or non-pretreated cells with different incubation time. (A) HeLa, 72 h; (B) HeLa, 96 h; (C) A549, 72 h.

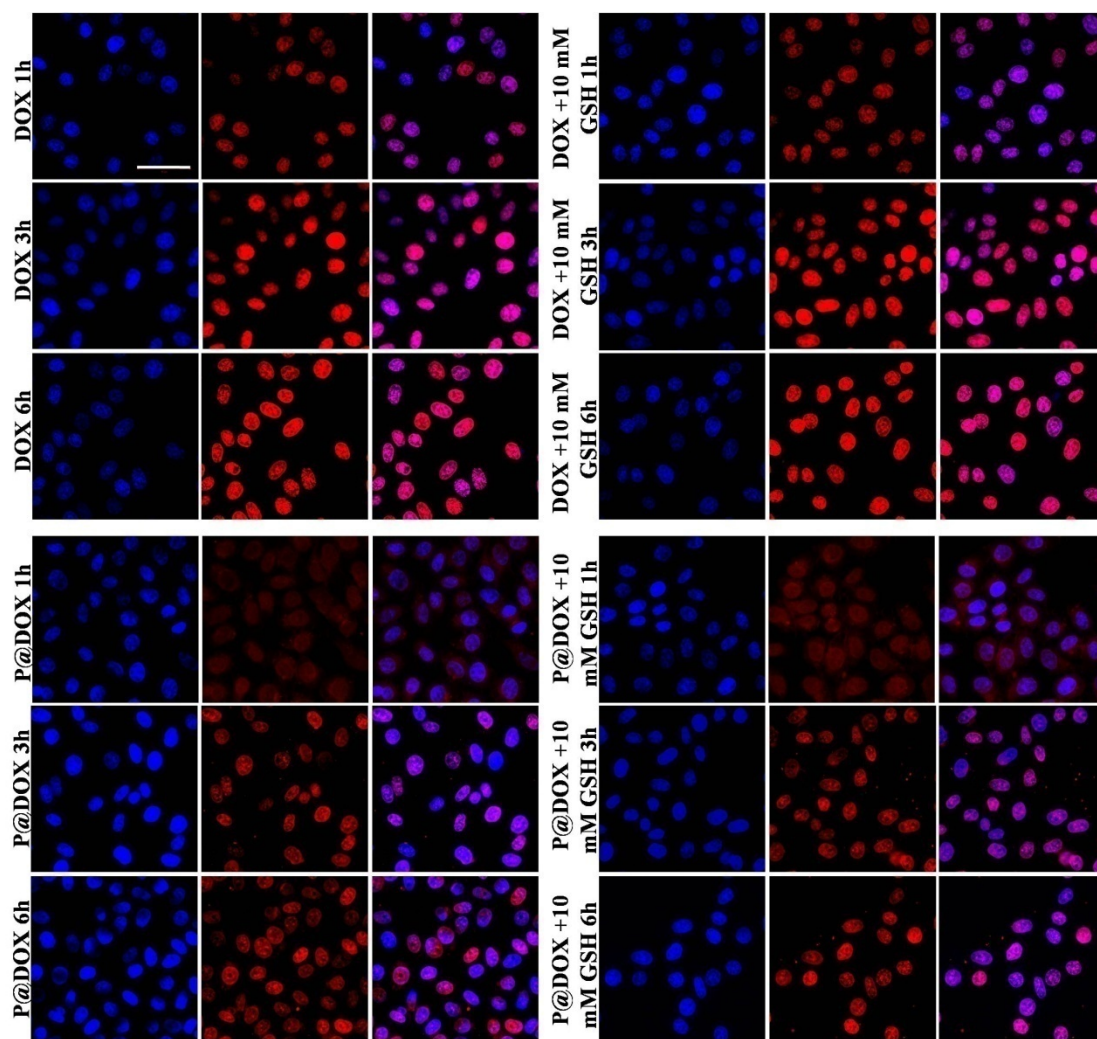

**Figure S11.** Representative CLSM images of A549 cells incubated with DOX and PRDSP@DOX (blue:DAPI, red:DOX. Bar:50  $\mu$ m).

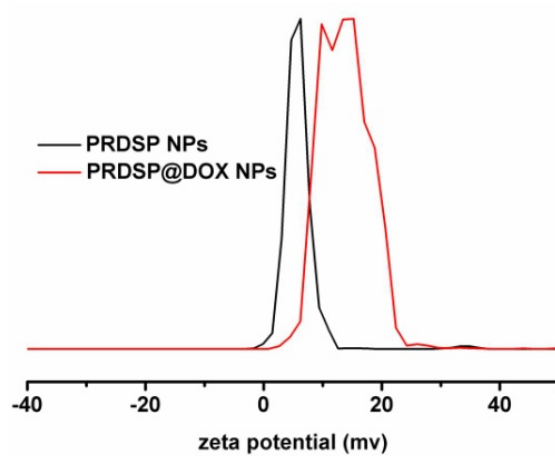

**Figure S12.** Zeta potential (mv) of blank PRDSP NPs and PRDSP@DOX NPs.
